# Supplementary material for: Heterogeneous reaction of HO 2 with airborne TiO 2 particles and its implication for climate change mitigation strategies
Source: Copernicus journal article supplement (doi:10.5194/acp-2017-439), 2017-05-22
Supplement: Supplementary file [file acp-2017-439-AC1-supplement.pdf]

We thank the two anonymous referees and D. Visioni for their helpful comments.

We have replied to each point in turn below, the comments are given in italics first, with our response then given in normal type. Where appropriate, the text for the revised manuscript then follows in red type within speech marks.

### **Anonymous Referee #1**

Clearly you are a Shakespearean scholar! Thanks for the adapted quotation from "A midsummer night's dream".

*Comment 1: P2 L41 "showing sulphate aerosols to be unsuitable for solar radiation management" - this line is too strong. There are arguments why sulphate, or indeed any aerosol, should not be used. But if aerosol injection is to be considered, then sulphate is a significant contender by virtue of being nature's choice. i.e. in its favour is that there are natural experiments (volcanoes) with which to evaluate its performance and there are unlikely to be any surprises. The same cannot be said of titania.*

Response 1: We entirely agree. We will soften the language. We discuss the eruption of Mt Pinatubo and the subsequent effects of the increased sulphate aerosol on observed stratospheric ozone concentrations. The revised text will be stated as follows:

**"showing that sulphate aerosols could be unsuitable for solar radiation management"**

*Comment 2: P4 L96 - be more precise about the temperature that the experiment was conducted at, provide mean and standard deviation, rather than ~293 K.*

Response 2: All experiments were conducted at room temperature. However, due to the time it takes to conduct an experiment not all experiments could be conducted on the same day. The average temperature across all experiments was 293 K. The standard deviation of the temperatures was 3 K. This will be stated in the new manuscript as follows:

**"A schematic diagram of the experiment is shown in Figure 1, and all experiments were undertaken at room temperature ( $293 \pm 3$  K) and under normal laboratory levels of illumination."**

*Comment 3: P4 L98 - what is the flow tube material? What wavelengths of light are omitted when the flow tube is shrouded?*

Response 3: The aerosol flow tube was made of borosilicate glass. The experiments were conducted within a laser laboratory where there is no natural light present. Any light that could enter the flow tube would originate from the standard fluorescence strip lights in the laboratory. Therefore the wavelengths of light omitted when the flow tube is shrouded would be within the visible wavelength region.

**"In this investigation a borosilicate glass aerosol flow tube coupled with a sensitive HO<sub>2</sub> detector based on chemical conversion followed by laser-induced fluorescence detection of**

OH (George et al., 2013) has been used to study the kinetics of the heterogeneous reaction of HO<sub>2</sub> with airborne TiO<sub>2</sub> nanoparticles at different RH.”

Comment 4: P5 L117 - *what form of titania was used (rutile, anatase etc.)? N.b. the surface characteristics of different forms of titania might have different surface reactivity.*

Response 4: We specify that the titania used is a blend known as Degussa (P5 L117), which consists of 80% anatase and 20% rutile. This particular blend is often used within laboratory experiments and is readily available.

“A solution of TiO<sub>2</sub> (Aldrich Chemistry 718467, 99.5% Degussa i.e. a blend of TiO<sub>2</sub> polymorphs 80% anatase and 20% rutile, 5 g in 500 ml of Milli-Q water) was placed in a commercial atomizer (TSI 3076) in order to produce a 1 L min<sup>-1</sup> flow entrained with TiO<sub>2</sub> particles, referred to as the aerosol flow.”

Comment 5: P5 L136 - *why do the particle diameters vary under different RH conditions? Titania is not significantly hygroscopic (as shown later in the paper with only monolayers of water being present at RH < 70%) so what is causing the size changes? Is it size dependent particle losses?*

Response 5: We are unsure ourselves to the precise reason for this, however, we agree that the cause may be associated with differences in aerosol transmission through the experimental setup at different RH before aerosols reach the flow tube. However, by placing the SMPS before and after the aerosol flow tube we have shown that there is not significant loss of aerosol in the flow tube. Another possible reason could be that aerosol generation could change slightly from day to day due, for example, to a blockage in some parts of the delivery set up (the measurements of the size distribution at the two RH were not done in the same day).

Comment 6: P11 L265 - *define V<sub>bridge</sub>*

Response 6: V<sub>bridge</sub> is defined as an oxygen vacancy within the main body of the text on P12 L272. We will define it at first usage here in the caption.

“Figure 6. Simplified diagram of the important steps of HO<sub>2</sub> reactive uptake onto the surface of TiO<sub>2</sub>. Grey circles = Ti, blue circles = O, orange circles = H, green circles = oxygen vacancy (V<sub>bridge</sub>), solid black lines = chemical bond and dashed lines = hydrogen bond.”

Comment 7: P14 L349 - *only one SEM image is shown, presumably other images showed similar sphericity to the particle shown in Fig.7?*

Response 7: Many other images were taken which do indeed show that all particles are spherical, however, due to the method of sample preparation for the SEM it was difficult to find a particle in isolation as most were agglomerated together.

Comment 8: P366 L366 - *note that a gamma of 1 implies every collision is reactive. This result maybe implies the laboratory work was not required?*

If the measured HO<sub>2</sub> uptake coefficient at room temperature is used, then the model shows that this reaction has negligible effect on stratospheric O<sub>3</sub> or HO<sub>2</sub>. However, as outlined in the paper, the uptake coefficient is likely to be much higher at the very low temperatures found in the stratosphere. It is not possible to measure the uptake coefficient at these temperatures, and so a value of 1 (the highest possible) was assumed. The impact on O<sub>3</sub> and HO<sub>2</sub> is still small, but there is an effect. However, although the experimental values are not used in the model, the experiments are still very valuable, as they enable the mechanism for uptake of HO<sub>2</sub> on TiO<sub>2</sub> to be explored. In addition, TiO<sub>2</sub> provides a good model for mineral dusts and hence these experiments aid to help the interpretation of uptake of trace gases onto mineral dusts. The use of TiO<sub>2</sub> as an environmental catalyst is also not confined to the stratosphere and the dataset may be relevant for tropospheric applications of TiO<sub>2</sub> aerosols, for example in its use for the surface oxidation of pollutants such as VOCs and NO<sub>2</sub>.

Comment 9: P15 L388 - insert "to" in "...in order (to) follow..."

Response 9: This will be amended.

*"N<sub>2</sub>O<sub>5</sub> is decreased by up to 0.5% in the region of TiO<sub>2</sub> particles, which is assumed to follow the distribution of sulphate particles after the Mt. Pinatubo eruption, in order to follow the approach of previous modelling studies."*

Comment 10: P16 L395 - *the deviation between the consequences of N<sub>2</sub>O<sub>5</sub> uptake between this study and the study of Tang et al. is interesting. A plausible explanation is provided but the authors are encouraged to discuss this discrepancy with the Tang et al. modellers (if they have not already).*

Response 10: Prior to submission we had a brief verbal discussion with Dr James Keeble (University of Cambridge) who performed the modelling work in Tang et al (2014). Based on that discussion we suggested possible deviations in the modelling approaches which may be responsible for the differences in the N<sub>2</sub>O<sub>5</sub> response. Following this review comment we have been in further contact with Dr Keeble. This has not led to any definitive conclusions, as that would require significant extra work. However, along the lines suggested by the reviewer we have agreed to keep in contact and investigate these differences in future work. We will mention the need for further work in the text.

## **Anonymous Referee #2**

Comment 1: *The experiments were conducted very carefully but I question the authors' choice to study this reaction at room temperature when the relevant temperatures for solar geoengineering aerosol would be much lower. They did a careful study of the impact of adsorbed water on the reaction but this is irrelevant for stratospheric conditions. This dataset is valuable, even for our understanding of mineral dust chemistry in the troposphere, but the relevance for the stratosphere is in question.*

Response 1: We acknowledge in the manuscript that the experiments were not conducted at stratospherically relevant temperatures, and state the experimental difficulties which prevent us from performing experiments at such temperatures (P3 L86, P14 L365). However, this represents the first measurements of HO<sub>2</sub> onto TiO<sub>2</sub> aerosols, and stratospheric TiO<sub>2</sub> injection has been suggested as a mitigation strategy. Both previous studies of N<sub>2</sub>O<sub>5</sub> and ClONO<sub>2</sub> onto TiO<sub>2</sub> aerosols by Tang et al. were also conducted only at room temperature for the same reason. Although the application is framed within the context of stratospheric injection of aerosols for solar radiation management schemes, we agree that the dataset is also valuable for our understanding of mineral dust chemistry in the troposphere and evaluating the feasibility of other environmental catalytic applications of TiO<sub>2</sub> within the troposphere such as removal of VOCs and NO<sub>2</sub>.

*Comment 2: In the comparison to existing datasets, instead of comparing the reactive uptake coefficient for HO<sub>2</sub> on TiO<sub>2</sub> to other species on TiO<sub>2</sub>, which is like comparing to apples to oranges, you can perhaps look at trends (ClONO<sub>2</sub> on H<sub>2</sub>SO<sub>4</sub> vs. TiO<sub>2</sub> and HO<sub>2</sub> on H<sub>2</sub>SO<sub>4</sub> vs. TiO<sub>2</sub>, etc).*

Response 2: We accept this point although it is still useful to compare the behaviour of HO<sub>2</sub> towards TiO<sub>2</sub> aerosols with the very few other studies of uptake of trace gases onto TiO<sub>2</sub> aerosols, as it gives the opportunity to compare and contrast the likely mechanisms for uptake of trace gases onto TiO<sub>2</sub> aerosols. There have been very limited studies of HO<sub>2</sub> uptake onto solid surfaces which have been coated with H<sub>2</sub>SO<sub>4</sub> aerosol material (Gershenson et al., Faraday Discussions, 1995, 100, 83-100) and we will include a comparison of these experiments with uptake onto TiO<sub>2</sub>. The modified text is as follows:

“Measurements of  $\gamma(\text{HO}_2)$  have been made onto sulphuric acid aerosols and thin films. These values are not consistent and range from  $> 0.1$  to  $< 0.01$  (Cooper and Abbatt, 1996; Thornton and Abbatt, 2005; Hanson et al., 1992; Gershenson et al., 1995). The most recent measurement of  $\gamma(\text{HO}_2)$  on aqueous phase sulphuric acid aerosols was conducted at 35% RH (Thornton and Abbatt, 2005). That study estimated a value of  $\gamma(\text{HO}_2) = 0.006 \pm 0.004$ , lower than onto TiO<sub>2</sub> aerosols. Whilst the aerosols in that study are unlike sulphuric acid aerosols in the stratosphere, formed via condensation of sulphuric acid vapour onto existing solid aerosols, the relatively low value of  $\gamma(\text{HO}_2)$  measured is consistent with the likely low partitioning of HO<sub>2</sub> to its more reactive conjugate base, O<sub>2</sub><sup>-</sup>, and a lower solubility of HO<sub>2</sub> in aerosols with a low pH. The study concludes that heterogeneous uptake of HO<sub>2</sub> onto sulphuric acid aerosols would show a strong negative temperature dependence driven by the temperature dependence of the Henry’s Law coefficient. It is likely that at temperatures typical of the lower stratosphere (205 – 215 K)  $\gamma(\text{HO}_2)$  onto sulphuric acid particles approach 1 (Gershenson et al., 1995).”

#### References:

Cooper, P. L., and Abbatt, J. P. D.: Heterogeneous interactions of OH and HO<sub>2</sub> radicals with surfaces characteristic of atmospheric particulate matter, *Journal of Physical Chemistry*, 100, 2249-2254, 1996.

Thornton, J., and Abbatt, J. P. D.: Measurements of HO<sub>2</sub> uptake to aqueous aerosol: Mass accommodation coefficients and net reactive loss, *J. Geophys. Res.-Atmos.*, 110, 10.1029/2004jd005402, 2005.

Hanson, D. R., Burkholder, J. B., Howard, C. J., and Ravishankara, A. R.: Measurement of hydroxyl and hydroperoxy radical uptake coefficients on water and sulfuric acid surfaces, *The Journal of Physical Chemistry*, 96, 4979-4985, 10.1021/j100191a046, 1992.

Gershenson, Y. M., Grigorieva, V. M., Ivanov, A. V., and Remorov, R. G.: O<sub>3</sub> and OH sensitivity to heterogeneous sinks of HO<sub>x</sub> and CH<sub>3</sub>O<sub>2</sub> on aerosol particles, *Faraday Discussions*, 100, 83-100, 1995.

### Comment from Daniele Visoni

Comment 1: *I find this paper very interesting, and laboratory work on the topic of solar radiation management very promising. However, I have a comment regarding the discussion on sulfate geoengineering (SG) in the Introduction. In particular, while on line 34- 35 effects on ozone depletion by SG are mentioned, in the following lines only old papers discussing ozone measurements after the Pinatubo eruption are mentioned, and from that comes the conclusion that those result are "showing sulphate aerosols to be unsuitable for solar radiation management". However, in recent years many papers regarding possible SG consequences on ozone depletion have been published. Discussion paper if this would not change the scope of the paper itself, since it focuses on TiO<sub>2</sub> particles, I would suggest adding some updated citations on the matter just to represent in an objective way the ongoing discussion of solar radiation management methods. I include some possible papers to be cited regarding SG*

Response 1: This comment is helpful, thank you, and the introduction will be amended accordingly to include citation of the 2017 Review on sulfate geoengineering. The following text will be added:

*"The impact of sulphate geoengineering to stratospheric ozone concentrations is projected to decrease in time as concentrations of Br and Cl containing atmospheric species are expected to fall, so much so that beyond 2050 the additional available surface area provided by sulphate geoengineering is predicted to enhance conversion of NO<sub>x</sub> (NO<sub>x</sub> = NO + NO<sub>2</sub>) to HNO<sub>3</sub> resulting in an increase of stratospheric ozone (Visoni et al., 2017)."*

### Reference:

Visoni, D., Pitari, G., and Aquila, V.: Sulfate geoengineering: a review of the factors controlling the needed injection of sulfur dioxide, *Atmos. Chem. Phys.*, 17, 3879-3889, 10.5194/acp-17-3879-2017, 2017.
